# Supplementary material
Source: HighWire-hosted journal article supplement (https://www.cmajopen.ca/highwire/filestream/80721/field_highwire_adjunct_files/3/open-2013-0003-04-at.pdf)

Appendix 4: Contribution of G7 countries to the world's pool of patents in 7 major cardiovascular disease categories. Data source: Canadian Patents Database (1978–2008).

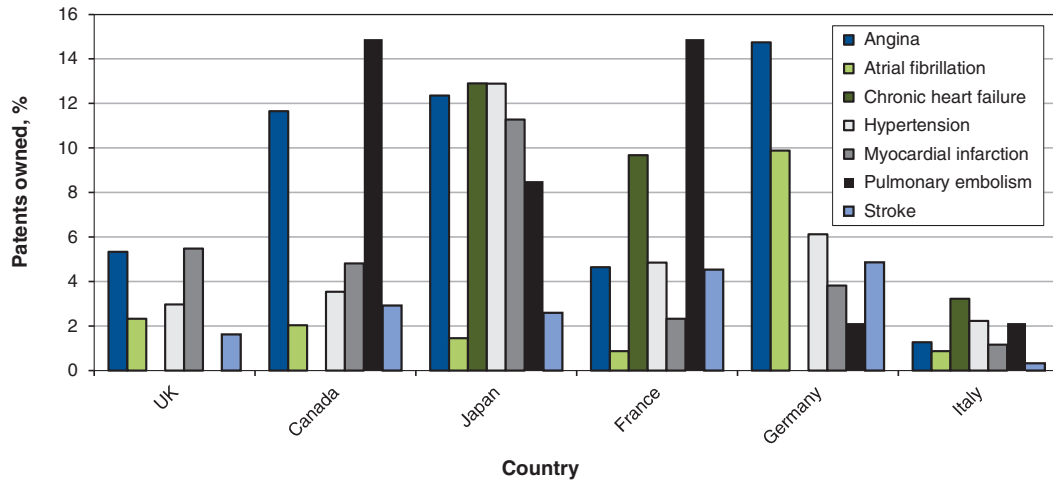

Supplement: open-2013-0003-04-at.pdf [file open-2013-0003-04-at.pdf]
